# Supplementary material for: Transcriptional Analysis of the Early Ripening of ‘Kyoho’ Grape in Response to the Treatment of Riboflavin
Source: PubMed Central journal article supplement (PMC6678464; doi:10.3390/genes10070514), 2019-07-06
Supplement: genes-10-00514-s001.pdf [file genes-10-00514-s001.pdf]

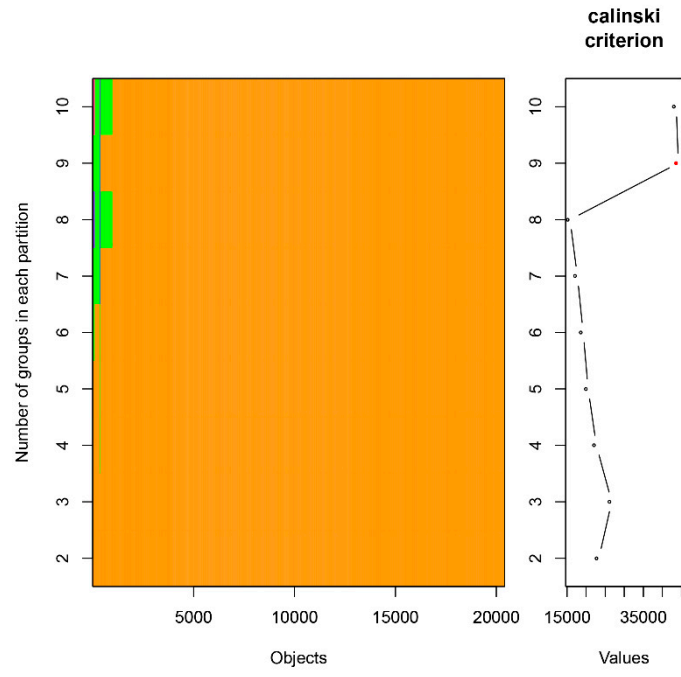

**Supplemental Figure S1.** The optimization of partitions of clusters in TCseq analysis.

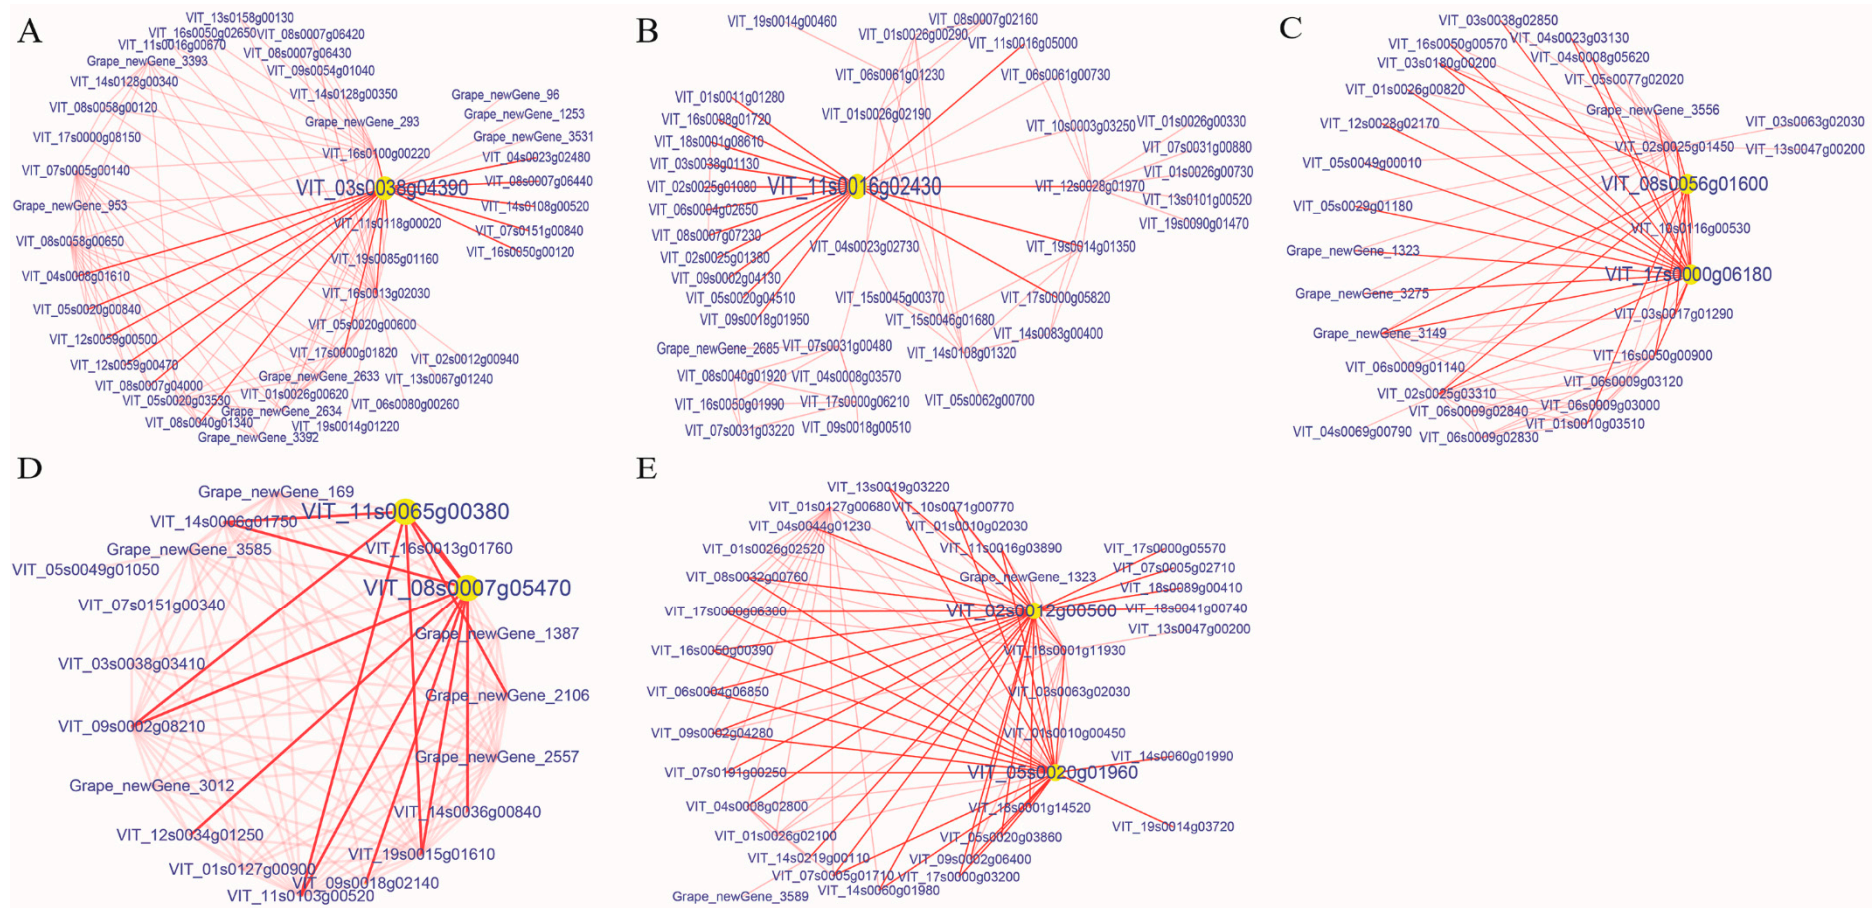

**Supplemental Figure S2.** Cytoscape representation of co-expressed genes with edge weight  $\geq 0.1$ . The important hub gene was noted in yellow. (A) The hub gene of the C2 stage; (B) The hub gene of the C4 stage; (C) The hub gene of the C5 stage; (D) The hub gene of the T3 stage; and (E) The hub gene of T4 stage, respectively.

**Supplemental Table S1.** Primers used for quantitative PCR analysis in this study.

| Gene name                 | Gene ID           |         | Sequence (5'-3')       |
|---------------------------|-------------------|---------|------------------------|
| <i>ELIP1</i>              | VIT_05s0020g04110 | Forward | TCACAGTCACGTCAACCGAT   |
|                           |                   | Reverse | CCGCAACAAAGCCTACCAT    |
| <i>XTH32</i>              | VIT_06s0061g00550 | Forward | AGGTTACTTCAGTGCTGCCATC |
|                           |                   | Reverse | GAGGCTTATCCAGTGTTGTTCC |
| <i>VIT_211s0016g04920</i> | VIT_11s0016g04920 | Forward | TGGCAAAGAATGTGGCTGG    |
|                           |                   | Reverse | GGCAATGCTGGCAACAAC     |
| <i>ATHSP22</i>            | VIT_18s0089g01270 | Forward | TCTTTGCCCAACTTGTCGTC   |
|                           |                   | Reverse | GCCTGTTTGGAGGTTTCACTT  |
| <i>GH9B15</i>             | VIT_02s0025g00430 | Forward | AAGACCGACGCAGACTCATT   |
|                           |                   | Reverse | CACATTGGACTCCTCCGATT   |
| <i>BZIP9</i>              | VIT_04s0008g02750 | Forward | GTGGTGATGGCGAAGGGTAT   |
|                           |                   | Reverse | TGAGCGGAGGTTTCTTAGGG   |
| <i>HCEF1</i>              | VIT_08s0007g01570 | Forward | GGCCGTGGAAGAGAGTTACT   |
|                           |                   | Reverse | CGCACCTTTGTTCTGTTGAG   |
| <i>GDSL</i>               | VIT_05s0020g04840 | Forward | TGGAGTGGTCTGTGATCCTT   |
|                           |                   | Reverse | CTCATTACCCTCACTGCTC    |

**Supplemental Table S2.** Overview of the 'Kyoho' transcriptome sequencing.

| Sampl<br>es | Clean reads         | Clean bases    | GC Content (%) | Q20 (%) | Q30 (%) | Unique Map | Mapping rate (%) |
|-------------|---------------------|----------------|----------------|---------|---------|------------|------------------|
| C11         | 35,278,395 (98.58%) | 10,523,043,944 | 47.14          | 97.32   | 94.47   | 46,381,190 | 65.74            |
| C12         | 27,486,349 (98.42%) | 8,192,198,634  | 47.40          | 97.37   | 94.48   | 34,840,243 | 63.38            |
| C21         | 30,867,813 (98.43%) | 9,199,338,978  | 47.16          | 97.47   | 94.63   | 40,546,408 | 65.68            |
| C22         | 28,184,064 (98.43%) | 8,399,870,658  | 46.86          | 97.47   | 94.68   | 38,417,757 | 68.16            |
| C31         | 25,718,449 (98.45%) | 7,667,592,892  | 48.00          | 97.13   | 94.09   | 32,236,962 | 62.67            |
| C32         | 31,863,349 (98.46%) | 9,501,218,124  | 48.25          | 97.15   | 94.14   | 39,693,382 | 62.29            |
| C41         | 28,700,254 (98.50%) | 8,555,888,188  | 47.75          | 97.23   | 94.26   | 36,753,426 | 64.03            |
| C42         | 27,709,439 (98.41%) | 8,260,755,972  | 47.21          | 97.40   | 94.63   | 36,964,844 | 66.70            |
| C51         | 33,098,799 (98.56%) | 9,859,370,600  | 46.56          | 96.83   | 92.02   | 44,398,084 | 67.07            |
| C52         | 32,482,251 (98.62%) | 9,678,549,430  | 46.99          | 96.91   | 92.16   | 44,012,511 | 67.75            |
| T11         | 35,990,802 (98.49%) | 10,731,368,632 | 47.42          | 97.40   | 94.60   | 47,470,731 | 65.95            |
| T12         | 36,180,711 (98.53%) | 10,782,502,072 | 47.83          | 97.44   | 94.61   | 47,826,003 | 66.09            |
| T21         | 26,892,431 (98.61%) | 8,019,430,484  | 46.82          | 97.51   | 94.72   | 36,084,511 | 67.09            |
| T22         | 24,445,704 (98.25%) | 7,287,194,396  | 47.18          | 97.38   | 94.47   | 32,048,688 | 65.55            |
| T31         | 25,908,751 (98.37%) | 7,721,128,896  | 47.83          | 97.27   | 94.35   | 33,218,794 | 64.11            |
| T32         | 32,503,991 (98.42%) | 9,684,925,524  | 47.40          | 97.38   | 94.52   | 43,022,785 | 66.18            |
| T41         | 26,882,981 (98.28%) | 8,015,950,740  | 47.60          | 97.19   | 94.20   | 34,737,161 | 64.61            |
| T42         | 26,466,916 (98.25%) | 7,889,034,102  | 47.82          | 97.22   | 94.21   | 34,236,505 | 64.68            |
| T51         | 28,840,052 (98.04%) | 8,591,264,612  | 46.72          | 97.08   | 94.02   | 39,519,828 | 68.52            |
| T52         | 27,216,227 (98.17%) | 8,111,370,698  | 47.10          | 97.17   | 94.13   | 36,778,933 | 67.57            |

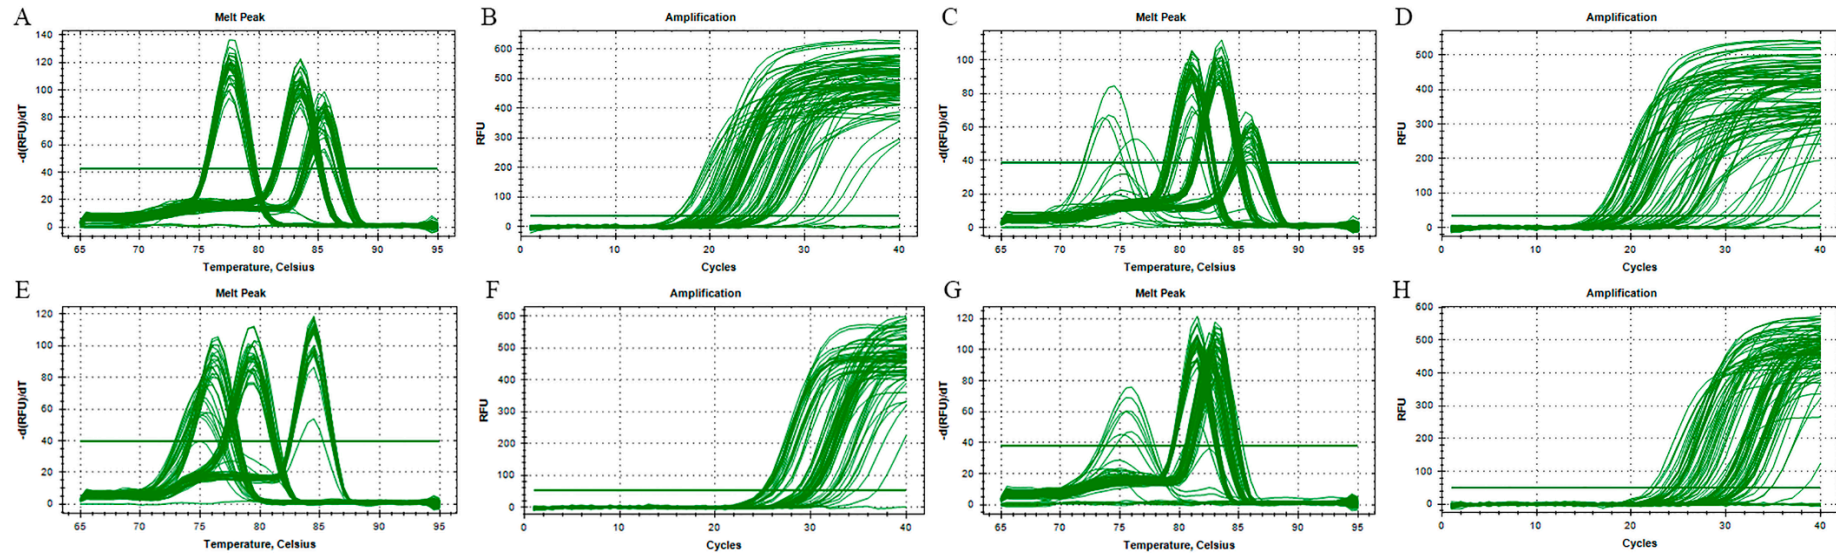

**Supplemental Figure S3.** The amplification efficiency and melt curve details of eight genes in qRT-PCR analysis. (A) The melt curve of *VIT\_211s0016g04920*, *ATHSP22*, and *Ubiquitin* genes; (B) The amplification efficiency details of *VIT\_211s0016g04920*, *ATHSP22*, and *Ubiquitin* genes; (C) The melt curve of *XTH32*, *ELIP1*, and *Ubiquitin* genes; (D) The amplification efficiency details of *XTH32*, *ELIP1*, and *Ubiquitin* genes; (E) The melt curve of *GDSL*, *BZIP9*, and *Ubiquitin* genes; (F) The amplification efficiency details of *GDSL*, *BZIP9*, and *Ubiquitin* genes; (G) The melt curve of *HCEF1*, *GH9B15*, and *Ubiquitin* genes; (H) The amplification efficiency details of *HCEF1*, *GH9B15*, and *Ubiquitin* genes, respectively.
